# Supplementary material for: Untargeted Metagenomic Investigation of the Airway Microbiome of Cystic Fibrosis Patients with Moderate-Severe Lung Disease
Source: MDPI journal article supplement (doi:10.3390/microorganisms8071003), 2020-07-04
Supplement: s1 [file s1]

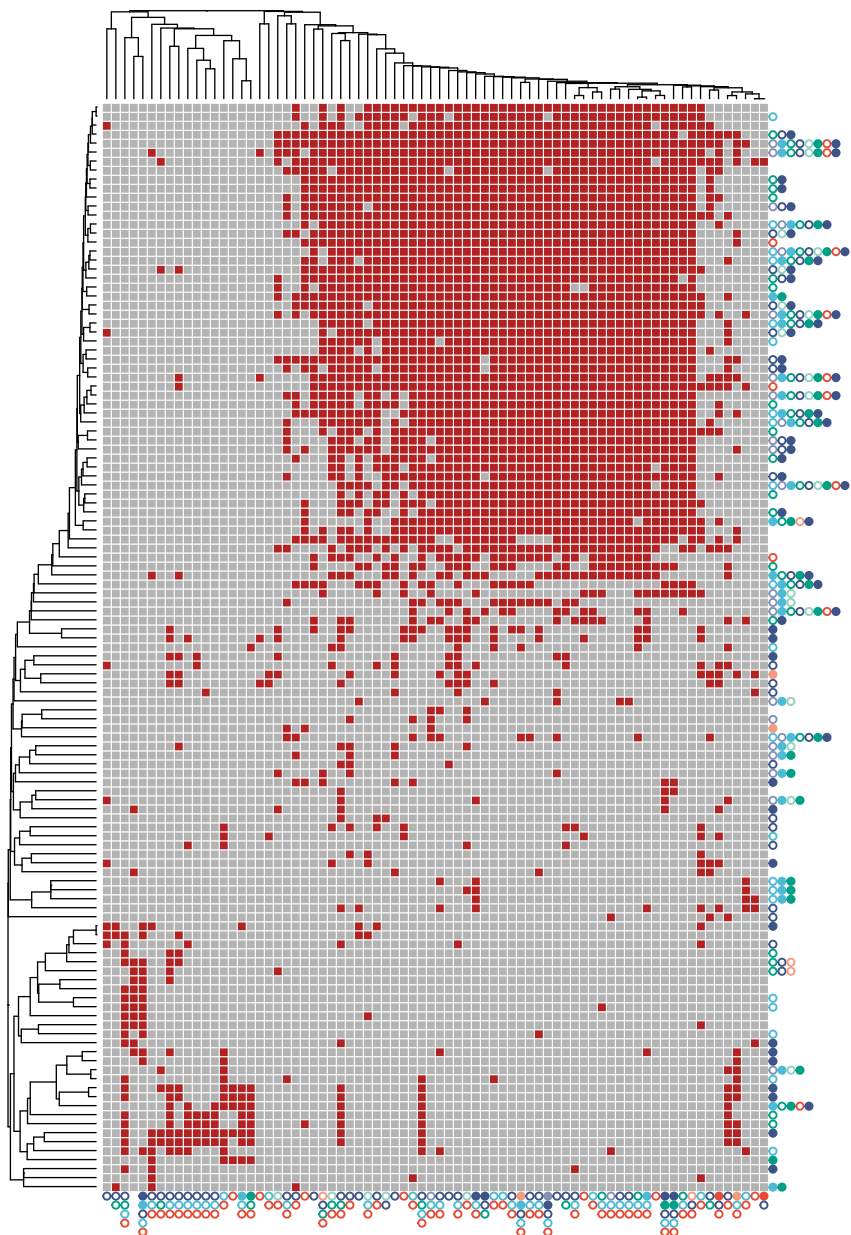

- aminoglycoside antibiotic
- cephalosporin
- fluoroquinolone antibiotic
- penam
- carbapenem
- oxazolidinone antibiotic
- rifamycin antibiotic
- glycopeptide antibiotic
- peptide antibiotic
- nitroimidazole antibiotic
- macrolide antibiotic
- tetracycline antibiotic
- monobactam
