# Supplementary material for: Untargeted Metagenomic Investigation of the Airway Microbiome of Cystic Fibrosis Patients with Moderate-Severe Lung Disease
Source: MDPI journal article supplement (doi:10.3390/microorganisms8071003), 2020-07-04

$-\log_{10}(\text{Adjusted } p\text{-value})$

TR Vs BL

RC Vs TR

RC Vs BL

Heterozygote

Homozygote

Effect size:  $\log_2(\text{fold-change})$

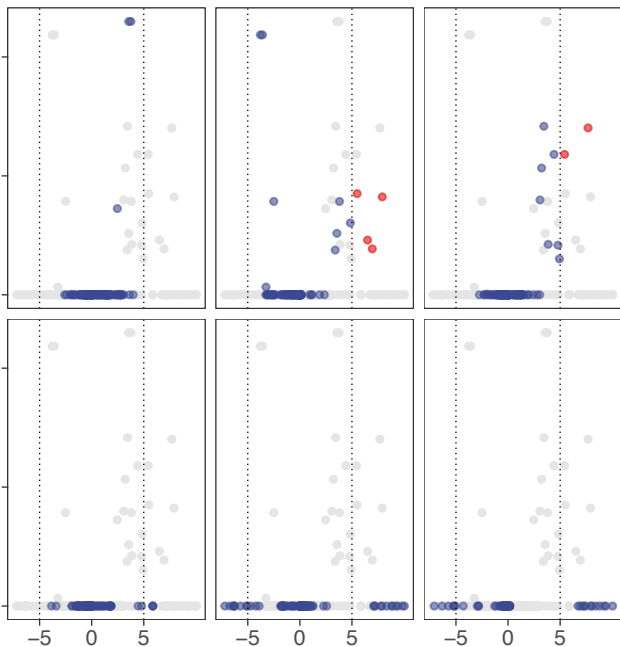

Supplement: s1 [file s1]
