# Supplementary material for: Untargeted Metagenomic Investigation of the Airway Microbiome of Cystic Fibrosis Patients with Moderate-Severe Lung Disease
Source: MDPI journal article supplement (doi:10.3390/microorganisms8071003), 2020-07-04
Supplement: s1 [file s1]

aminoglycoside antibiotic

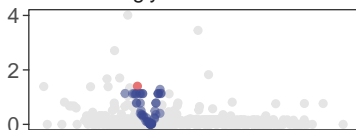

carbapenem

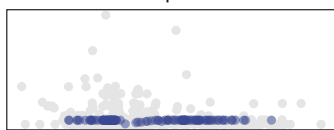

cephalosporin

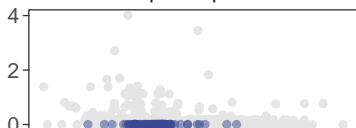

fluoroquinolone antibiotic

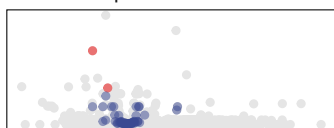

glycopeptide antibiotic

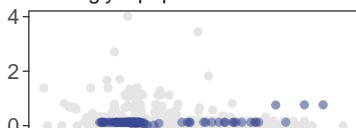

macrolide antibiotic

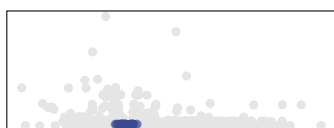

monobactam

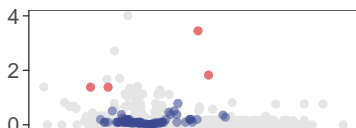

nitroimidazole antibiotic

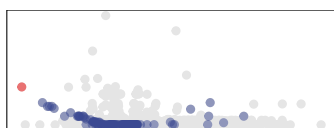

oxazolidinone antibiotic

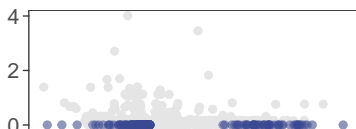

penam

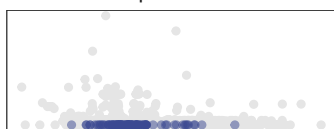

peptide antibiotic

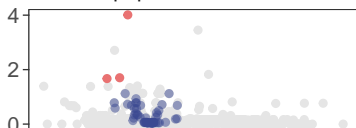

rifamycin antibiotic

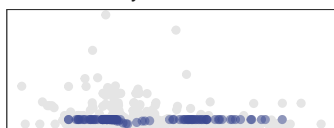

tetracycline antibiotic

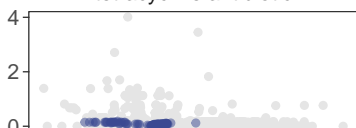 $-\log_{10}(\text{Adjusted } p\text{-value})$ Effect size:  $\log_2(\text{fold-change})$
