# Supplementary material for: Untargeted Metagenomic Investigation of the Airway Microbiome of Cystic Fibrosis Patients with Moderate-Severe Lung Disease
Source: MDPI journal article supplement (doi:10.3390/microorganisms8071003), 2020-07-04

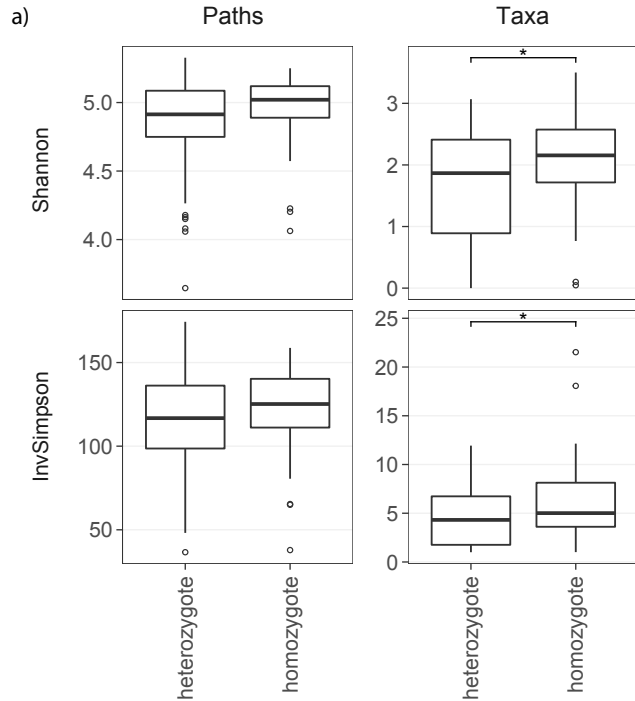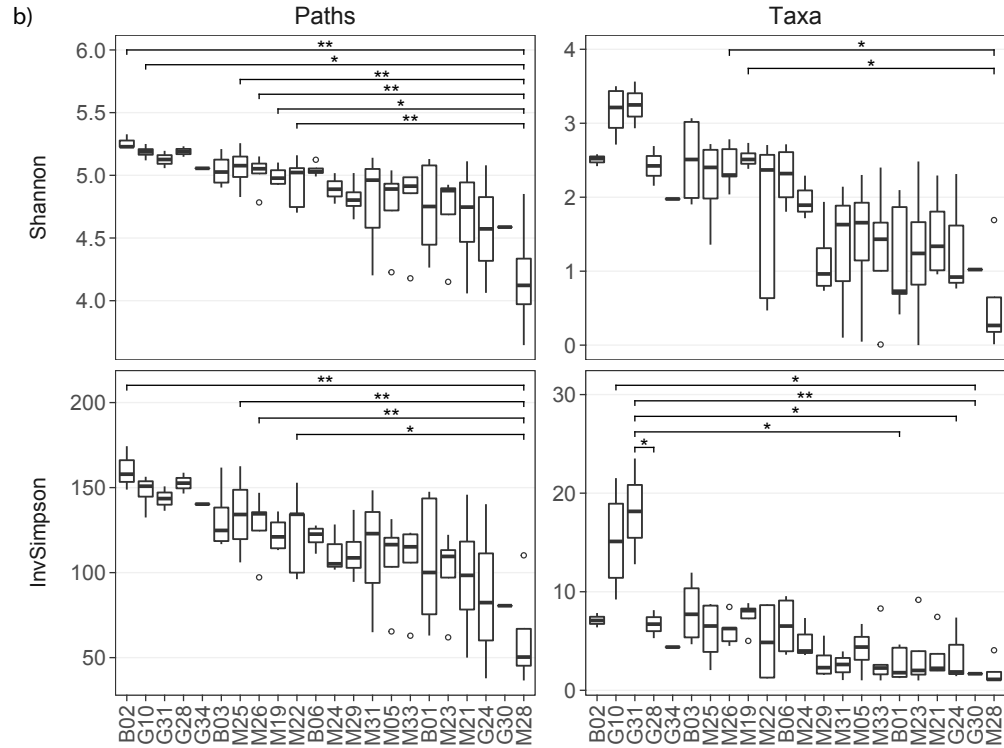

Supplement: s1 [file s1]
