# Supplementary figures and images for: Untargeted Metagenomic Investigation of the Airway Microbiome of Cystic Fibrosis Patients with Moderate-Severe Lung Disease
Source: MDPI journal article supplement (doi:10.3390/microorganisms8071003), 2020-07-04

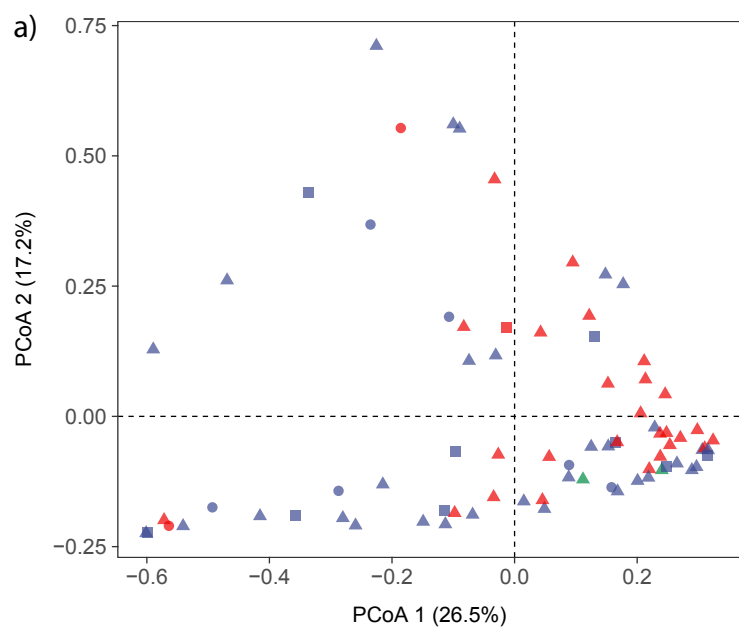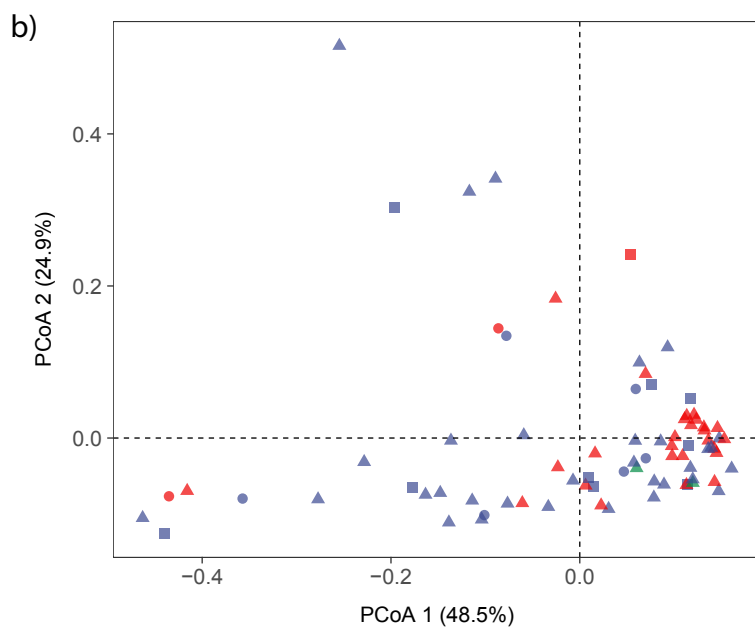

**Genotype** ● heterozygote ● homozygote ● other

**Status** ● TR ▲ BL ■ RC

Supplement: s1 [file s1]

TR Vs BL

RC Vs TR

RC Vs BL

Heterozygote

Homozygote

 $-\log_{10}(\text{Adjusted p-value})$ 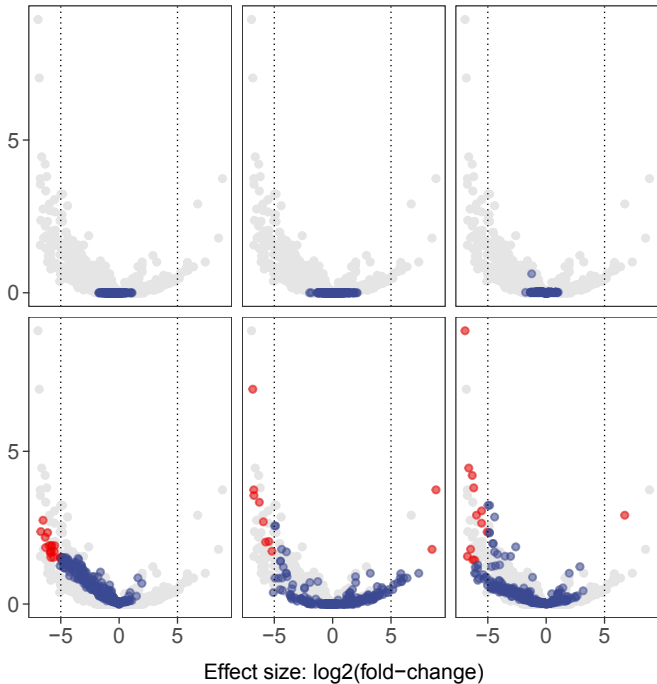

Supplement: s1 [file s1]

**a**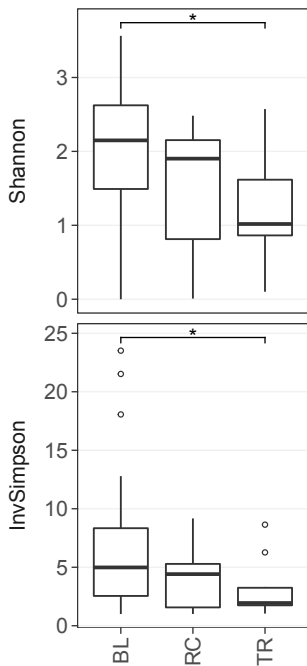**b**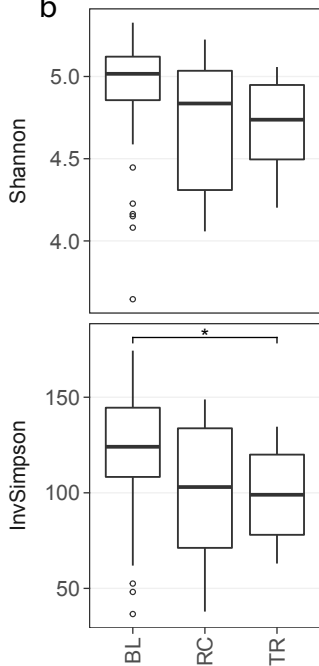

Supplement: s1 [file s1]
